# Supplementary material for: Synergistic regulation of coordination sites of Co3O4 by selective doping for efficient water oxidation
Source: Royal Society of Chemistry journal article supplement (doi:10.1039/d2cc03639h), 2022-01-01
Supplement: d2cc03639h1.pdf [file d2cc03639h1.pdf]

# Synergistic Regulation of Coordination Sites of $\text{Co}_3\text{O}_4$ by Selective Doping for Efficient Water Oxidation

Zhiyu Shao,<sup>a</sup> Xia Gao,<sup>a</sup> Qian Zhu,<sup>a</sup> Weifeng Zhao,<sup>a</sup> Xiaotian Wu,<sup>a</sup> Keke Huang<sup>\*,a</sup> and Shouhua Feng<sup>a</sup>

## Experimental Section

### Synthesis of $\text{Co}_3\text{O}_4$ , Al- $\text{Co}_3\text{O}_4$ , and In- $\text{Co}_3\text{O}_4$

Typically, 3 mmol of  $\text{Co}(\text{NO}_3)_2 \cdot 6\text{H}_2\text{O}$  (0.87 g) was dissolved in 25 ml ethanol to produce a clear solution. Then dry SBA-15 (0.30 g) was added to the solution. After stirring for 24 h, the solution was dried by evaporation of the solvent at 40 °C. The dried powder was grounded and impregnation was repeated one more time to prepare Co- composites. The dry powder was sintered at 550 °C for 3 h and finally the silica template was removed by stirring two times with 2 M hot NaOH solution. The resultant meso- $\text{Co}_3\text{O}_4$  was collected after washing with deionized water and ethanol for three times.

The synthetic methods of the samples are basically the same, but the difference lies in the addition of  $\text{Al}(\text{NO}_3)_3 \cdot 9\text{H}_2\text{O}$  or  $\text{In}(\text{NO}_3)_3 \cdot 4.5\text{H}_2\text{O}$  were added in the impregnation process for Al- $\text{Co}_3\text{O}_4$  and In- $\text{Co}_3\text{O}_4$ .

## **Catalyst characterization**

Powder X-ray diffraction (XRD) data was obtained by using a Rigaku D/Max 2550 diffractometer with Cu-K $\alpha$  radiation testing at 40 kV and 200 mA by step scanning in the angle range of 15° to 80° with increments of 3°·min<sup>-1</sup>. The morphology and structure of the samples were observed by scanning electron microscopy (SEM, JEM 7900F) and high-resolution transmission electron microscopy (HRTEM, FEI TecnaiG2 S-Twin) with a field emission gun operating at 200 kV. X-ray photoelectron spectroscopy (XPS, ESCALAB-250) was carried out with Thermo ESCA Lab 250 analyzer operating at constant analyzer power mode.

## **Electrochemical measurement**

Electrochemical measurements were conducted at the CHI 660E electrochemical workstation (Shanghai Chenhua Apparatus, China) using a standard three-electrode system, with a rotating disk electrode (5 mm in diameter) as the working electrode, a platinum slice as the counter electrode, and a Hg/HgO as the reference electrode in 1 M KOH. The working electrode was prepared by polishing it with 50 nm  $\alpha$ -Al<sub>2</sub>O<sub>3</sub> on a polishing cloth, then dropping 20  $\mu$ L of the catalyst ink and drying it naturally. The catalyst ink was made by mixing the sample and Ketjenblack in a ratio of 4 to 1 to improve the electrical conductivity of test samples, adding 1 ml of deionized water and 1 ml of isopropanol and 20  $\mu$ L of

Nafion solution, and then the solution was treated with ultrasonic for half an hour to make sure samples were well dispersed. The electrode was activated and the surface bubbles of it were removed by running cyclic voltammetry (CV). The OER curve was scanned from 0.2 to 0.9 V (vs Hg/HgO) with a scan rate of  $5 \text{ mV}\cdot\text{s}^{-1}$  in 1 M KOH. Electrochemical impedance spectroscopy (EIS) was obtained at 0.7 V (vs Hg/HgO) with frequencies ranging from 100 kHz to 0.1 Hz within an AC voltage of 5 mV.

### **Density Functional Theory Calculations.**

The density function calculations were performed using Vienna ab initio simulation package (VASP) with the projector augmented-wave (PAW) method. The generalized gradient approximation (GGA) functional parametrized by Perdew-Burke-Ernzerhof (PBE) was employed to describe the exchange correlation potential. A plane-wave energy cutoff of 400 eV was used and the energies and forces on each atom were converged to  $10^{-4}$  eV and  $0.05 \text{ eV}/\text{\AA}$ , respectively. A gamma-only point was used for the Brillouin zone integrations in geometry optimization, while other calculations employed a  $\Gamma$ -centered k-point mesh of  $5\times 5\times 3$ .

$\text{Co}_3\text{O}_4$  (311) surface model was built based on the exposed (311) surface of  $\text{Co}_3\text{O}_4$  observed by TEM results. On the basis of pristine  $\text{Co}_3\text{O}_4$ , Three Al atoms doped into octahedral sites to represent Al- $\text{Co}_3\text{O}_4$ , and four In

atoms doped into in octahedral and tetrahedral sites to represent Al-Co<sub>3</sub>O<sub>4</sub> based on the EDX analysis. A vacuum layer of 1.5 nm was used along the c direction normal to the surface to avoid periodic interactions in all models.

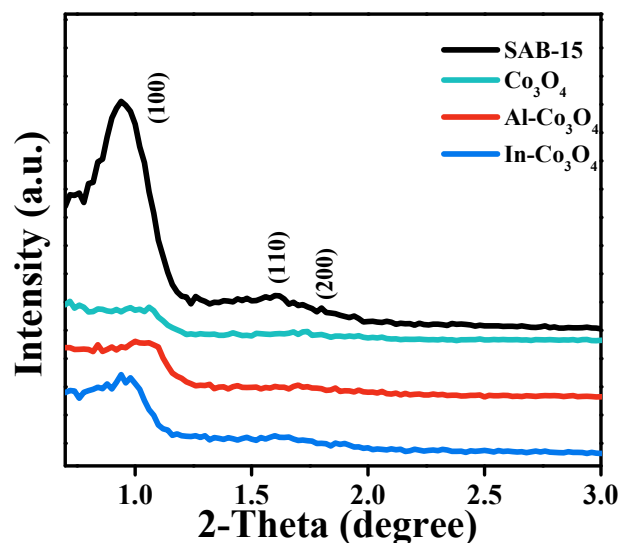

**Fig. S1** Small-angle XRD patterns of SBA-15,  $\text{Co}_3\text{O}_4$ ,  $\text{Al-Co}_3\text{O}_4$ , and  $\text{In-Co}_3\text{O}_4$ .

The mesoporous structures of the materials were further characterized by the small-angle XRD technique. Three well resolved diffraction peaks are observed in the XRD patterns of SBA-15. The peaks centered at  $2\theta = 0.94, 1.6, \text{ and } 1.8^\circ$  are indexed as (100), (110), (200) reflections. This is evidence of ordered two-dimensional hexagonal ( $p6mm$ ) structures. The three characteristic peaks can be also detected in the patterns of the supported materials, further verifying the overall ordered mesopores of SBA-15 are well preserved after loading  $\text{Co}_3\text{O}_4$  catalysts, meaning a slight decrease in long-range periodicity order of the support pores. A careful observation of the (100) peak reveals a noticeable shift to higher  $2\theta$  values in  $\text{Al-Co}_3\text{O}_4$ , which corresponding to shrinkage of the lattice parameter.

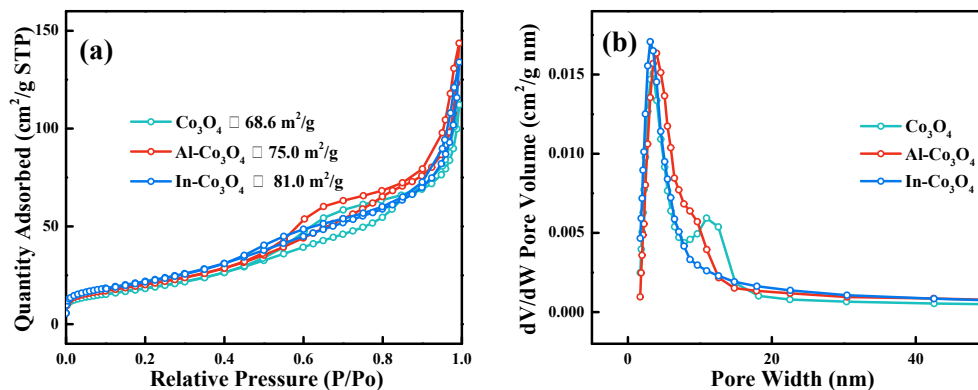

**Fig. S2** (a)  $\text{N}_2$  adsorption–desorption isotherms and (b) pore size distributions of  $\text{Co}_3\text{O}_4$ ,  $\text{Al-Co}_3\text{O}_4$ ,

and In-Co<sub>3</sub>O<sub>4</sub>.

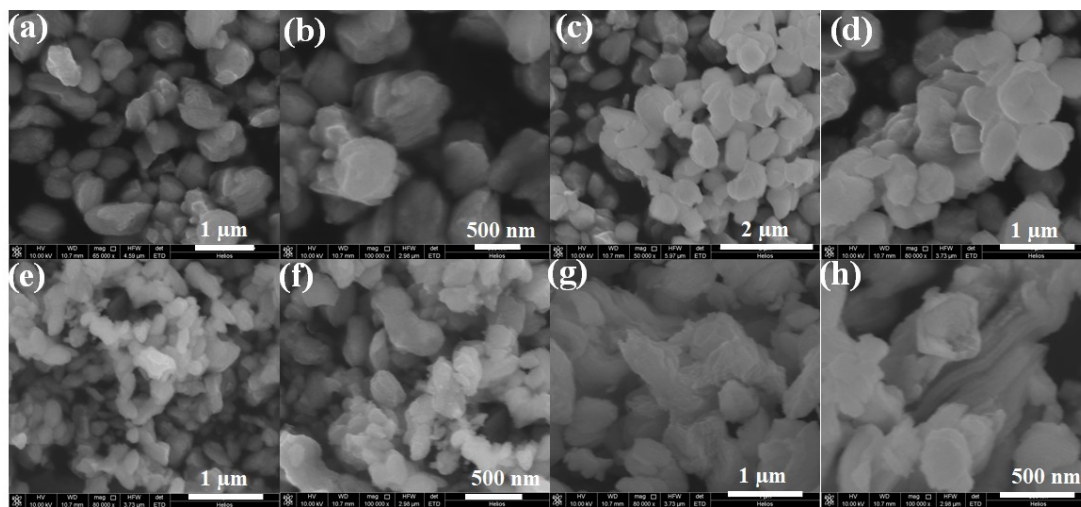

**Fig. S3** SEM images of (a-b) SBA-15, (c-d) Co<sub>3</sub>O<sub>4</sub>, (e-f) Al-Co<sub>3</sub>O<sub>4</sub>, and (g-h) In-Co<sub>3</sub>O<sub>4</sub>.

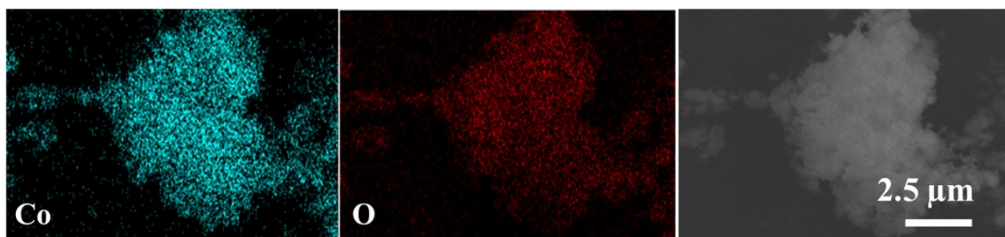

**Fig. S4** EDS elemental mapping images of  $\text{Co}_3\text{O}_4$ .

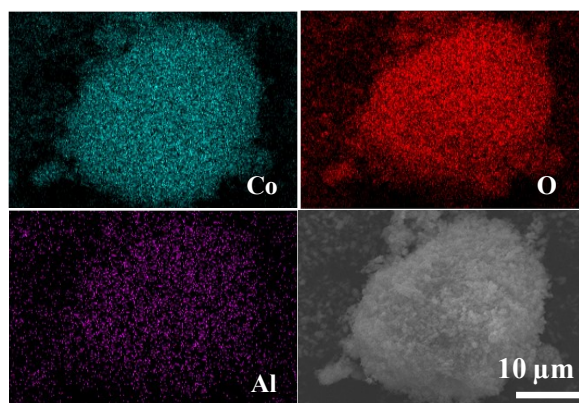

**Fig. S5** EDS elemental mapping images of  $\text{Al-Co}_3\text{O}_4$ .

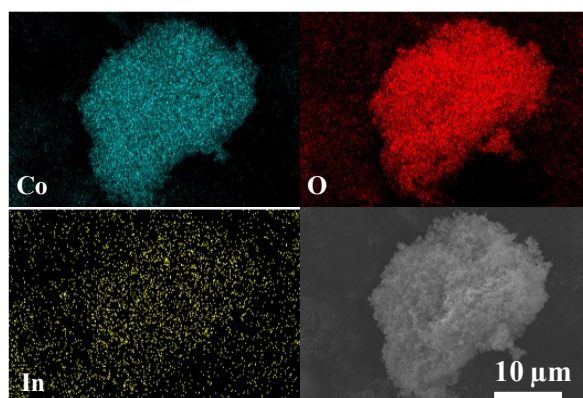

**Fig. S6** EDS elemental mapping images of  $\text{In-Co}_3\text{O}_4$ .

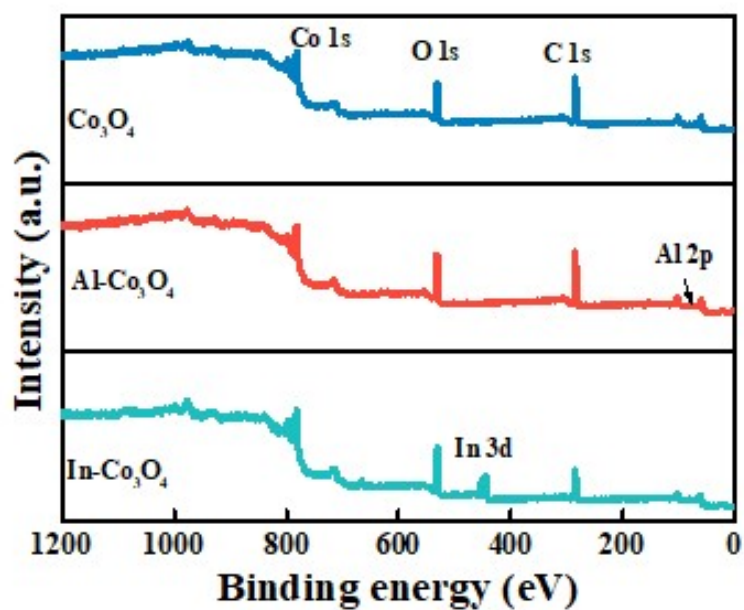

Fig. S7 XPS surface analysis of pure  $\text{Co}_3\text{O}_4$ ,  $\text{Al-Co}_3\text{O}_4$ , and  $\text{In-Co}_3\text{O}_4$ .

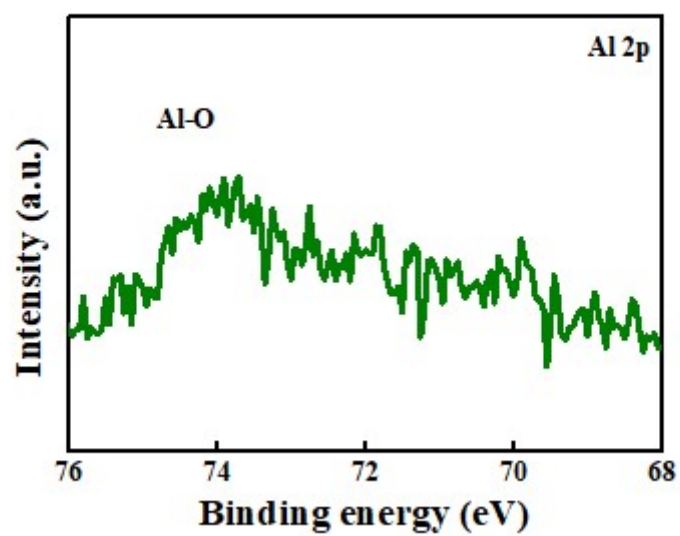

Fig. S8 XPS spectra of Al 2p of  $\text{Al-Co}_3\text{O}_4$ .



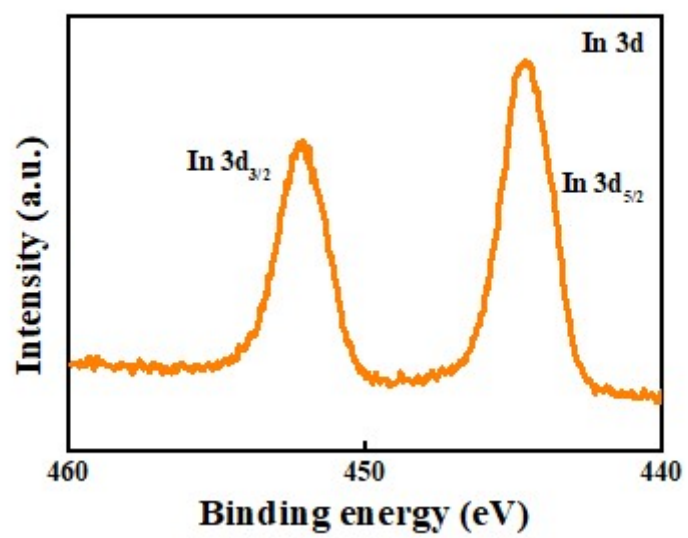

Fig. S9 XPS spectra of In 3d of In-Co<sub>3</sub>O<sub>4</sub>.

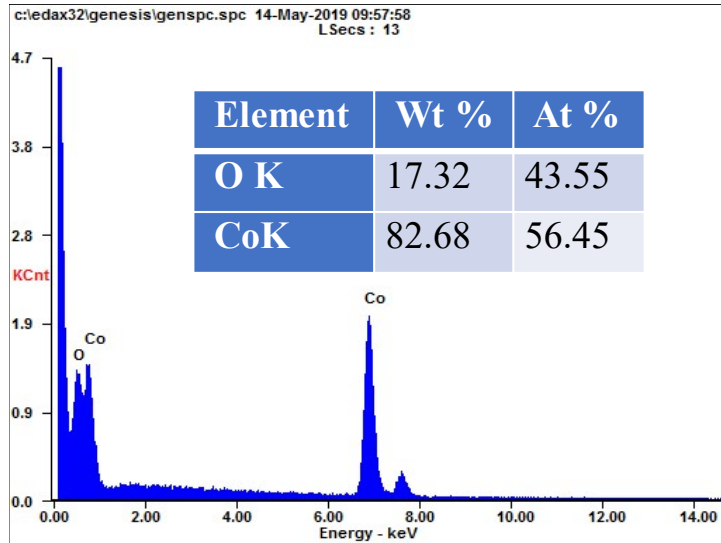

Fig. S10 EDX analysis for  $\text{Co}_3\text{O}_4$ .

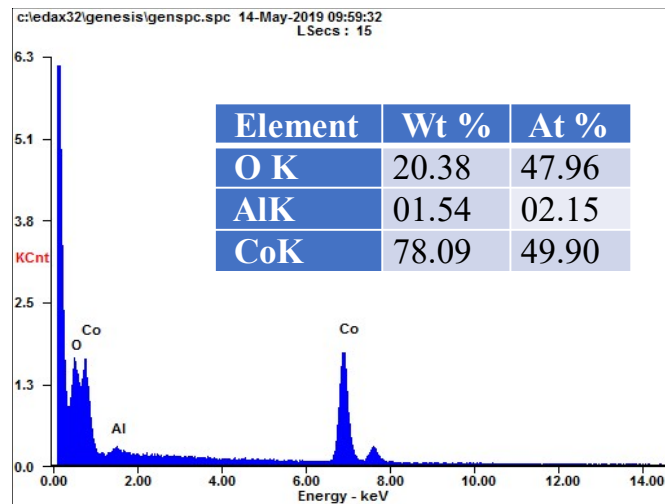

Fig. S11 EDX analysis for  $\text{Al-Co}_3\text{O}_4$ .

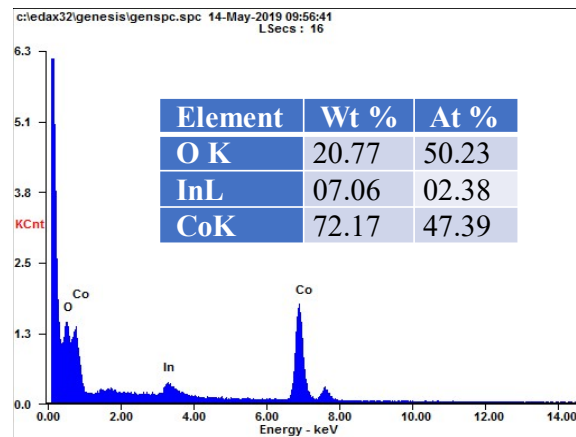

Fig. S12 EDX analysis for  $\text{In-Co}_3\text{O}_4$ .

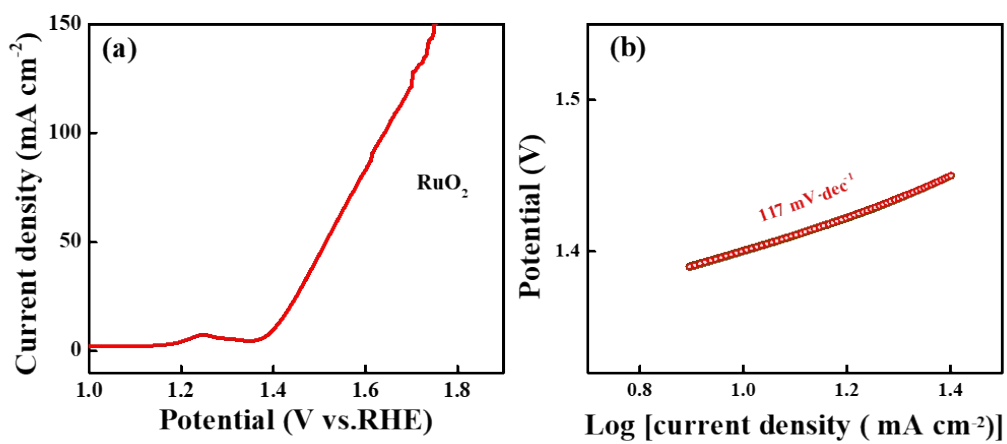

**Fig. S13** (a) LSV curve and (b) corresponding Tafel plot of commercial  $\text{RuO}_2$ .

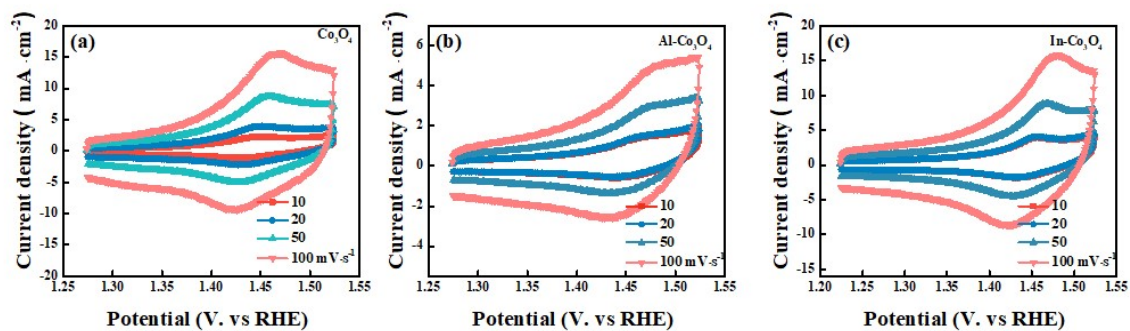

**Fig. S14** CV curves with at different scanning rates of  $\text{Co}_3\text{O}_4$ ,  $\text{Al-Co}_3\text{O}_4$ , and  $\text{In-Co}_3\text{O}_4$ .

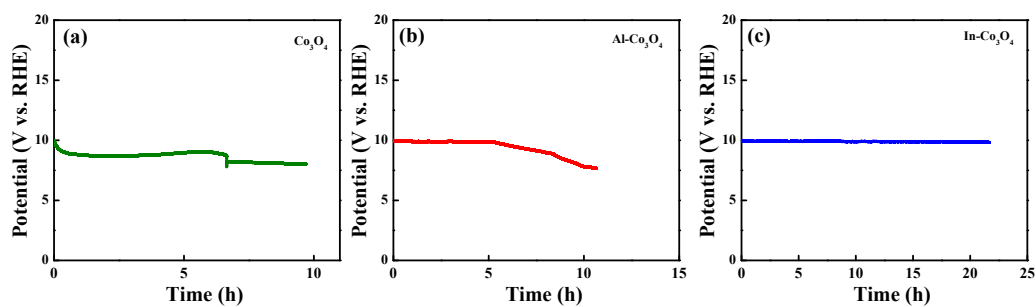

**Fig. S15** Chronoamperometric curves for  $\text{Co}_3\text{O}_4$ ,  $\text{Al-Co}_3\text{O}_4$ , and  $\text{In-Co}_3\text{O}_4$ .

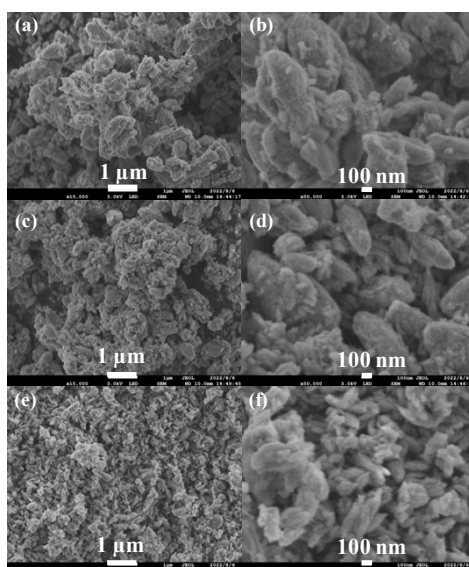

**Fig. S16** SEM images of (a & b)  $\text{Co}_3\text{O}_4$ , (c & d)  $\text{Al-Co}_3\text{O}_4$ , and (e & f)  $\text{In-Co}_3\text{O}_4$  at two different magnifications.

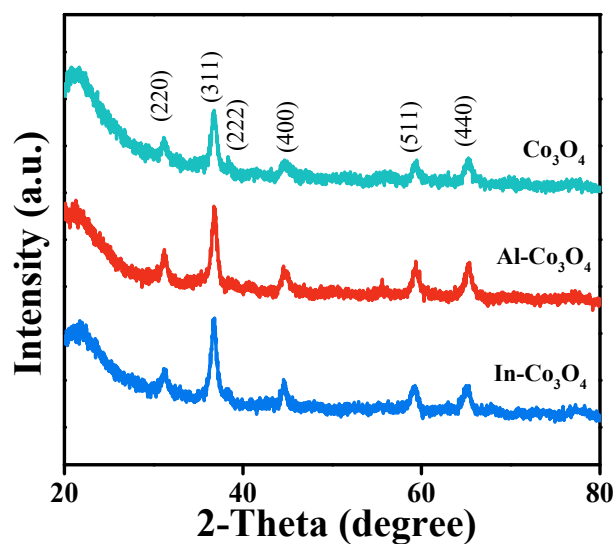

**Fig. S17** XRD patterns of the electrocatalysts  $\text{Co}_3\text{O}_4$ ,  $\text{Al-Co}_3\text{O}_4$ , and  $\text{In-Co}_3\text{O}_4$ .

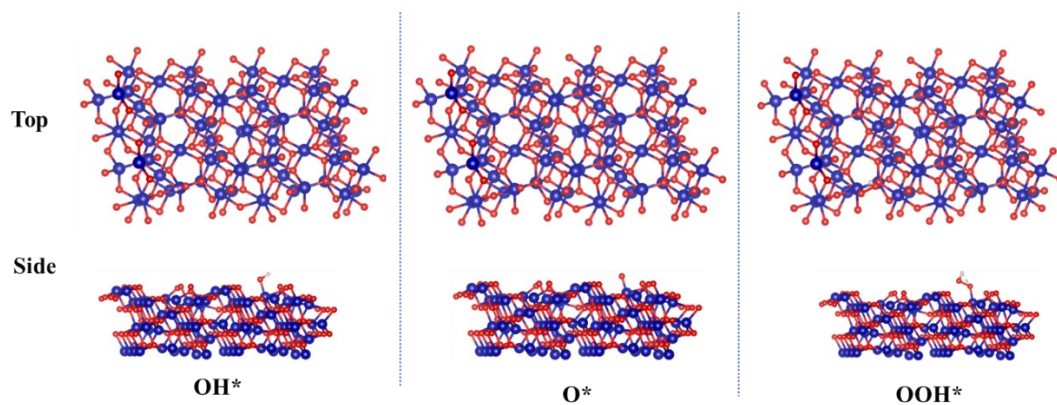

**Fig. S18** The optimized configurations of  $\text{Co}_3\text{O}_4$  chemisorption of  $\text{OH}^*$ ,  $\text{O}^*$ , and  $\text{OOH}^*$  intermediates.

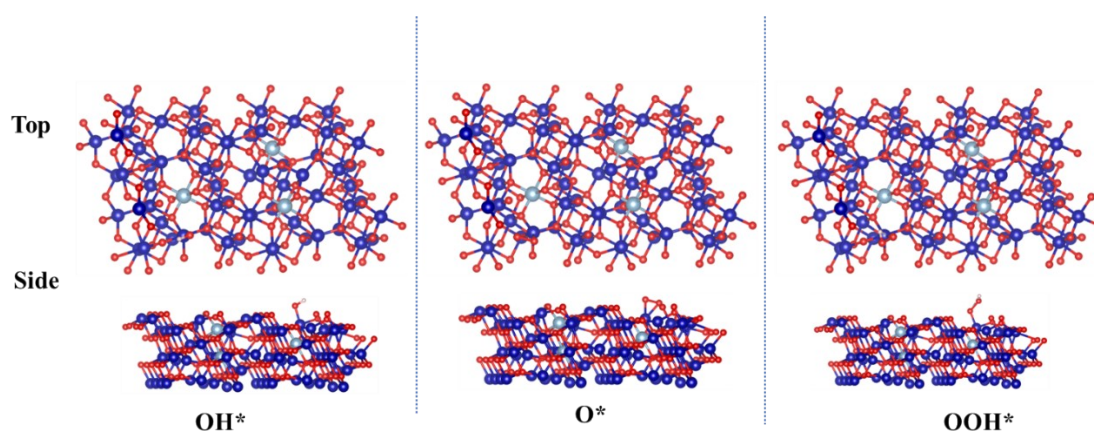

**Fig. S19** The optimized configurations of  $\text{Al-Co}_3\text{O}_4$  chemisorption of  $\text{OH}^*$ ,  $\text{O}^*$ , and  $\text{OOH}^*$  intermediates.

**Table S1** Comparison of the OER activity of as-prepared catalyst with that of some recently reported electrocatalysts.

| Catalyst                                                                                               | Current density (mA·cm <sup>-2</sup> ) | Overpotential (mV) | Tafel slope (mV·dec <sup>-1</sup> ) | Electrolyte | Reference                                                  |
|--------------------------------------------------------------------------------------------------------|----------------------------------------|--------------------|-------------------------------------|-------------|------------------------------------------------------------|
| In-Co <sub>3</sub> O <sub>4</sub>                                                                      | 10                                     | 340                | 74                                  | 1 M KOH     | <b>This work</b>                                           |
| CoCo <sub>2</sub> O <sub>4</sub> /NCNTs                                                                | 10                                     | 350                | 104                                 | 0.1 M KOH   | <i>Angew. Chem. Int. Ed.</i> 2022, 61, e2021146            |
| Zn <sub>x</sub> Ni <sub>1-x</sub> Co <sub>2</sub> O <sub>4</sub> /NCNTS                                | 10                                     | 410                | 118                                 | 0.1 M KOH   | <i>Angew. Chem. Int. Ed.</i> <b>2020</b> , 59, 6492-6499   |
| La <sub>0.5</sub> Sr <sub>0.5</sub> MnO <sub>3</sub> + 20 ALD cycles of Co <sub>3</sub> O <sub>4</sub> | 10                                     | 470                | 82                                  | 0.1 M KOH   | <i>Nano Energy.</i> <b>2020</b> , 71, 104564               |
| MnCo <sub>2</sub> O <sub>4</sub>                                                                       | 10                                     | 400                | 90                                  | 0.1 M KOH   | <i>Angew. Chem. Int. Ed.</i> <b>2017</b> , 56, 14977-14981 |
| CoFe <sub>2</sub> O <sub>4</sub> @N-CNF                                                                | 10                                     | 349                | 80                                  | 0.1 M KOH   | <i>Adv. Sci.</i> <b>2017</b> , 4, 1700226                  |
| Co/Co <sub>3</sub> O <sub>4</sub> @PGS                                                                 | 10                                     | 350                | 76                                  | 0.1 M KOH   | <i>Adv. Energy Mater.</i> <b>2018</b> , 8, 1702900         |
| Co <sub>2.25</sub> Fe <sub>0.75</sub> O <sub>4</sub>                                                   | 10                                     | 350                | 50                                  | 1.0 M KOH   | <i>J. Mater. Chem. A</i> 2021, 9, 25381-25390.             |
| Fe <sub>3</sub> C/CoFe <sub>2</sub> O <sub>4</sub> @CN Fs-1.5                                          | 10                                     | 340                | 83                                  | 0.1 M KOH   | <i>Chem. Eng. J.</i> <b>2021</b> , 424, 130460.            |
| V-LCO/Co <sub>3</sub> O <sub>4</sub>                                                                   | 10                                     | 354                | 73                                  | 1.0 M KOH   | <i>Nano Lett.</i> <b>2021</b> , 21, 8166–8174              |
| V-LCO                                                                                                  | 10                                     | 371                | 148                                 | 1.0 M KOH   | <i>Nano Lett.</i> <b>2021</b> , 21, 8166–8174              |
| Co <sub>3</sub> O <sub>4</sub>                                                                         | 10                                     | 522                | 192                                 | 1.0 M KOH   | <i>Nano Lett.</i> <b>2021</b> , 21, 8166–8174              |
| LCO                                                                                                    | 10                                     | 500                | 219                                 | 1.0 M KOH   | <i>Nano Lett.</i> <b>2021</b> , 21, 8166–8174              |
